# Supplementary material for: Electrochemical synthesis of biobased polymers and polymer building blocks from vanillin
Source: Royal Society of Chemistry journal article supplement (doi:10.1039/d1ra00649e), 2021-01-01
Supplement: d1ra00649e1.pdf [file d1ra00649e1.pdf]

## **Electronic Supplementary Information (ESI)**

### **Electrochemical Synthesis of Biobased Polymers and Polymer Building Blocks from Vanillin**

Robin Kunkel<sup>1,\*</sup>, Volkmar M. Schmidt<sup>2</sup>, Carsten Cremers<sup>1</sup>, Dominik Müller<sup>1</sup>, Detlef Schmiedl<sup>3</sup>, Jens Tübke<sup>1</sup>

<sup>1</sup>Fraunhofer Institute for Chemical Technology ICT, Department of Applied Electrochemistry, Joseph-von-Fraunhofer-Str. 7, D-76327 Pfinztal, Germany

<sup>2</sup>Mannheim University of Applied Sciences, Institute of Chemical Process Engineering, Paul-Wittsack-Str. 10, D-68163 Mannheim, Germany

<sup>3</sup>Fraunhofer Institute for Chemical Technology ICT, Department of Environmental Engineering, Joseph-von-Fraunhofer-Str. 7, D-76327 Pfinztal, Germany

[\*] *Corresponding author:* robin.kunkel@ict.fraunhofer.de

## 1. Product analysis of the divanillin synthesis

The product structure was confirmed by LC-DAD-MS, elemental analysis and FT-IR. LC-DAD-MS analysis of first batch synthesis of divanillin is shown in Fig. S1. First peak was assigned to remaining vanillin (4.9 wt.-% determined by GC-FID) and second peak was assigned to divanillin.

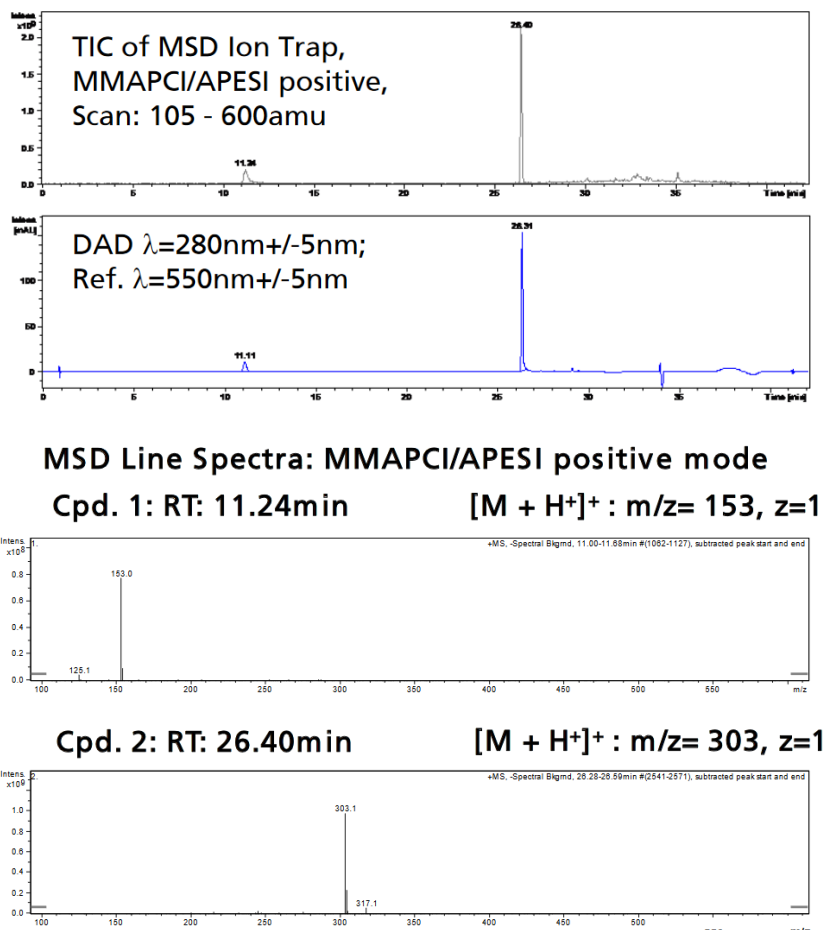

**Fig. S1** LC-DAD-MS spectra of divanillin. Set-up - Kinetex C8, 2.6  $\mu\text{m}$ , 100  $\text{\AA}$ , 3 mm x 100 mm  
A: Acetic acid-0.05%; B: Methanol; Gradient, 0-42 min, 0.5 ml min<sup>-1</sup>, T: 45 °C; MMAPCI/APESI pos.

Elemental Analysis (CHO) for divanillin (Found: C, 62.6; H, 5; O, 32.3. Calc. for C<sub>16</sub>H<sub>14</sub>O<sub>6</sub>:  
C, 63.6; H, 4.7; O, 31.8%).

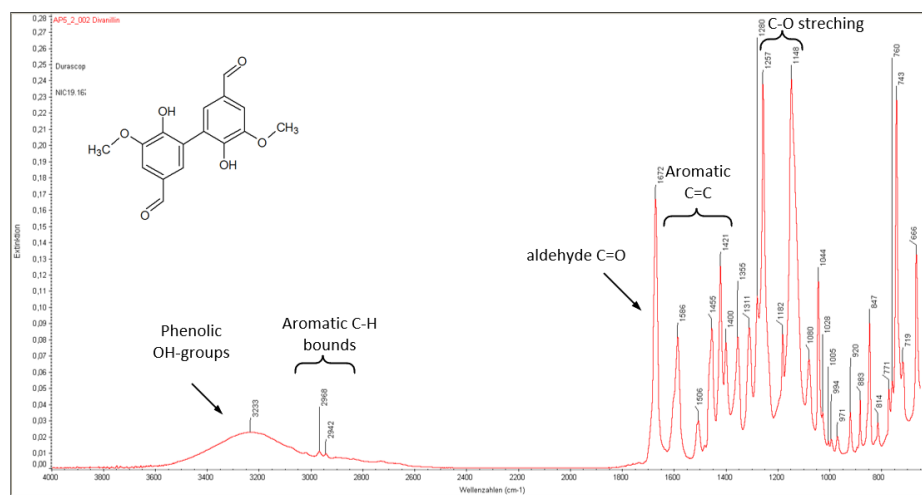

Fig. S2 FT-IR spectrum of divanillin, ATR-mode.

## 2. Electrochemical reduction of vanillin at GC

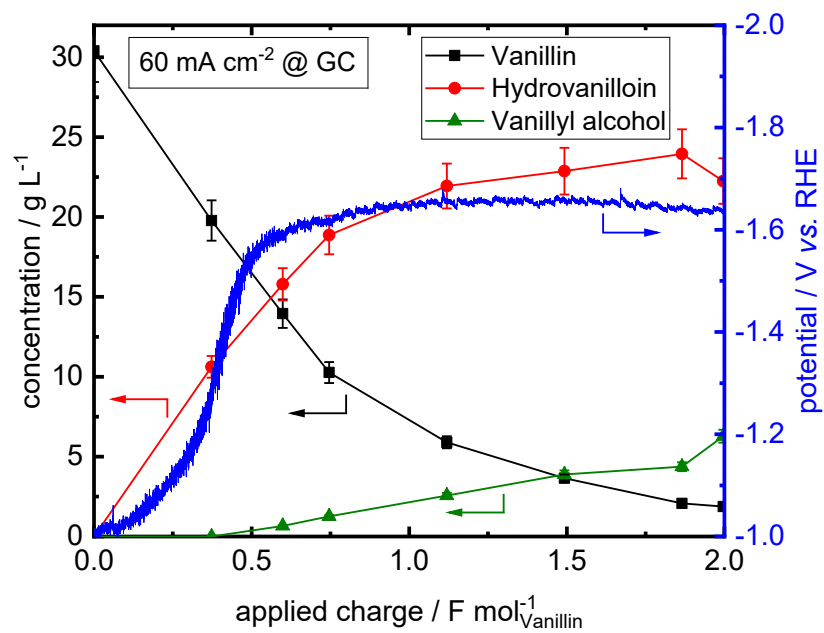

**Fig. S3** Potential and concentration course of the electrochemical vanillin reduction at GC at 60 mA cm<sup>-2</sup>. Analysis was carried out by capillary electrophoreses coupled with UV-Vis detection.

### 3. Isolation and identification of the product of the electrochemical vanillin reduction

**Table S1** Isolated product yields after an applied charge of 2 F mol<sup>-1</sup> at different current densities and at different cathode materials.<sup>a</sup>

| Cathode material | Current density (mA cm <sup>-2</sup> ) | Isolated product yield <sup>b</sup> after an applied charge of 2 F mol <sup>-1</sup> (%) |
|------------------|----------------------------------------|------------------------------------------------------------------------------------------|
| Zn               | 30                                     | 72.4                                                                                     |
|                  | 60                                     | 64.0                                                                                     |
|                  | 100                                    | 48.6                                                                                     |
| Pb               | 30                                     | 71.7                                                                                     |
|                  | 60                                     | 69.8                                                                                     |
|                  | 100                                    | 57.7                                                                                     |
| GC               | 30                                     | 69.1                                                                                     |
|                  | 60                                     | 62.4                                                                                     |
|                  | 100                                    | 50.0                                                                                     |

<sup>a</sup>Electrolysis was performed under following conditions - catholyte: 0.2 M Vanillin in 1 M sodium hydroxide, anolyte: 1 M sodium hydroxide, room temperature, catholyte stirred at 250 rpm. <sup>b</sup>Isolation of the product was carried out by titrating the catholyte to pH = 2 with 1 M HCl followed by filtration, washing and drying.

The isolated product was identified by HPLC-DAD-MSD, FT-IR and <sup>1</sup>H-, <sup>13</sup>C- and 2D-NMR (HSQC, <sup>13</sup>C/<sup>1</sup>H) as pure hydrovanilloin. Exemplary spectra of isolated hydrovanilloin synthesized at a Zn cathode at 30 mA cm<sup>-2</sup> with an applied charge of 2 F mol<sup>-1</sup> are shown in Fig.S4-S6. In the HPLC-DAD-MSD spectra, however, two product peaks were observed. The first peak was assigned to hydrovanilloin showing a molecule signal with a monoisotopic mass of 306 g mol<sup>-1</sup> and a signal with a monoisotopic mass of 288 g mol<sup>-1</sup> due to water fragmentation from the pinacol group. The second peak solely shows the water fragmented signal with a monoisotopic mass of 288 g mol<sup>-1</sup>, which would correspond to 1,2-bis(4-hydroxy-3-methoxyphenyl)ethanon being in keto-enol tautomeric equilibrium with 1,2-bis(4-hydroxy-3-methoxyphenyl)hydroxyethene. We suspect that dissolution of the isolated product in methanol for HPLC-DAD-MSD analysis leads to the water fragmentation. The <sup>1</sup>H-, <sup>13</sup>C- and 2D-NMR (HSQC, <sup>13</sup>C/<sup>1</sup>H) spectra of the same product reveal that peak 2 of the HPLC-DAD-MSD spectra is an artefact, as no water fragmentation is observed. Since the reductive electrochemical coupling of vanillin by pinacolization is a stereoselective reaction, two forms, namely the DL-form and the meso-form, are possible. The ratio between these two forms can be calculated by the methoxy groups signals or the C $\alpha$ -H $\alpha$  / C $\alpha'$ -H $\alpha'$  signals in the aliphatic region of hydrovanilloin in the <sup>1</sup>H-NMR spectra. The methoxy group signals were assigned to 3.67 ppm (meso-form) and 3.61 ppm (DL-form) and the C $\alpha$ -H $\alpha$  / C $\alpha'$ -H $\alpha'$  signals to 4.47 ppm (meso-form) and 4.41 (DL-form). A meso- to DL-form ratio of 78% is calculated.

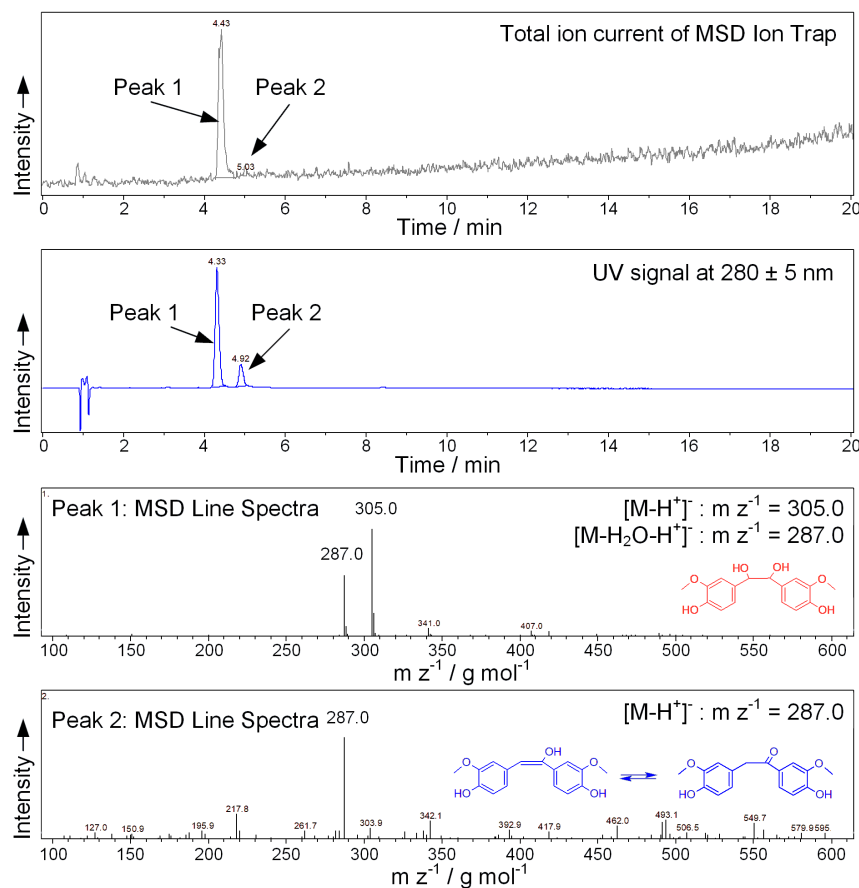

**Fig S4** HPLC-UV-MSD spectra of the isolated product dissolved in MeOH for analysis. (Vanillin concentration 0.2 M in 1 M sodium hydroxide solution, Zn cathode, 30 mA cm<sup>-2</sup>, 2 F mol<sup>-1</sup>, catholyte stirred at 250 rpm, RT)

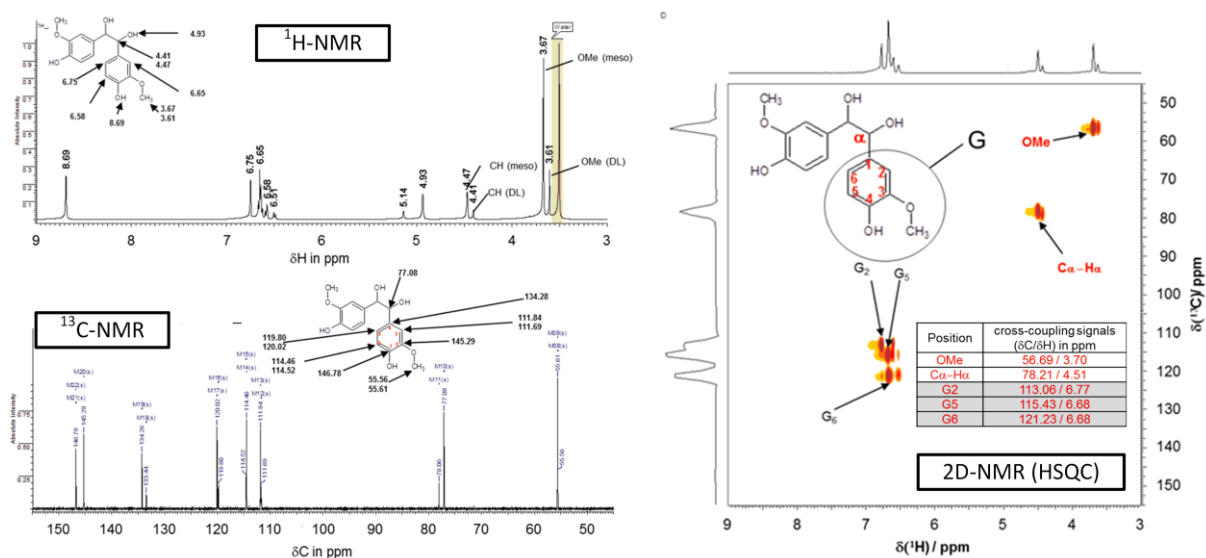

**Fig S5** <sup>1</sup>H-, <sup>13</sup>C- and 2D-NMR (HSQC, <sup>13</sup>C/<sup>1</sup>H) spectra of the isolated product dissolved in DMSO-d<sub>6</sub> recorded on a Bruker AVANCE spectrometer operating at 500 MHz. (Vanillin concentration 0.2 M in 1 M sodium hydroxide solution, Zn cathode, 30 mA cm<sup>-2</sup>, 2 F mol<sup>-1</sup>, catholyte stirred at 250 rpm, RT)

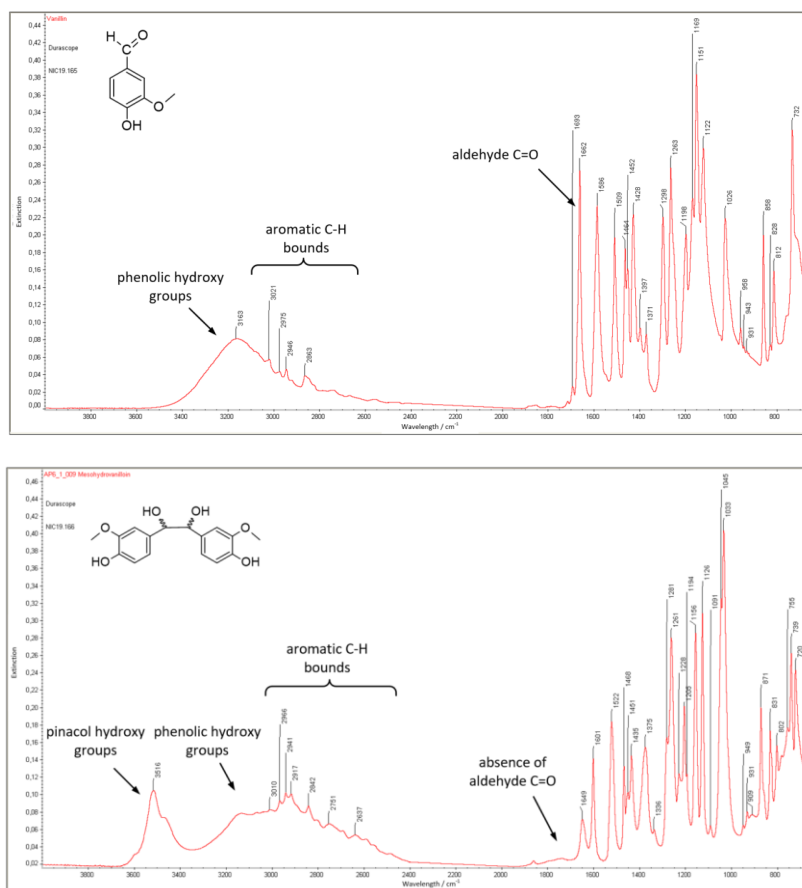

Fig. S6 FT-IR spectra of vanillin and hydrovanillin, ATR-mode.

#### 4. Electrochemical synthesis of polyvanillin

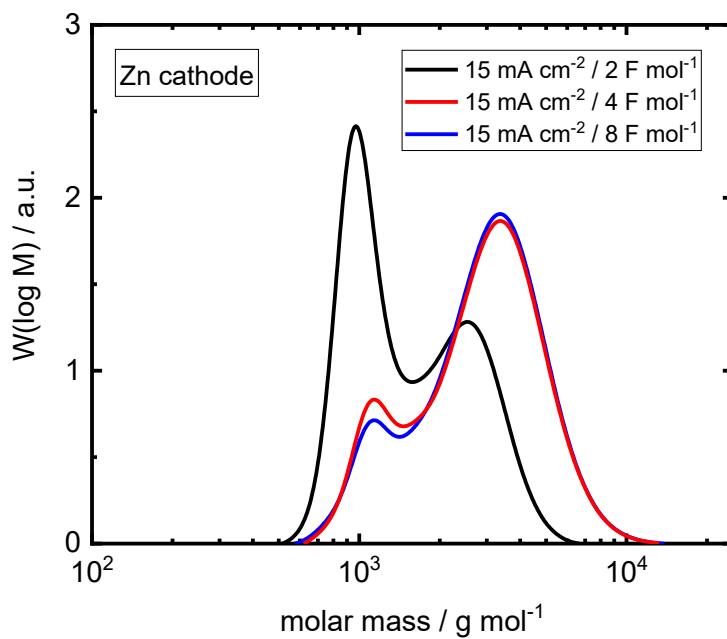

**Fig. S7** Molecular weight distribution of isolated polyvanillin determined by SEC (calibrated versus pullulan standard) after different amount of applied charges at a current density of 15 mA cm<sup>-2</sup> (run 1-3).

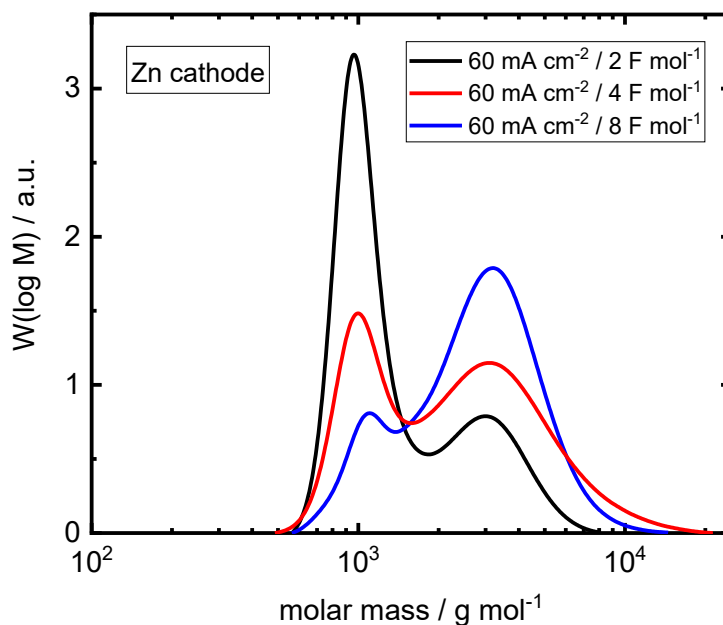

**Fig. S8** Molecular weight distribution of isolated polyvanillin determined by SEC (calibrated versus pullulan standard) after different amount of applied charges at a current density of 60 mA cm<sup>-2</sup> (run 7-9).



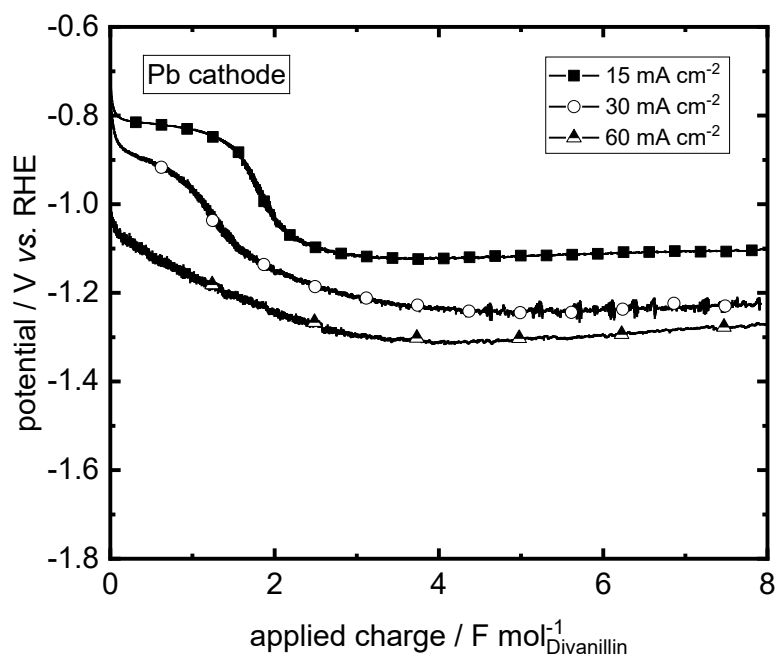

**Fig. S9** Potential-charge plots of the electrochemical divanillin reduction at a Pb cathode (5 cm<sup>2</sup>). Electrolysis was performed under following conditions – anode: Ni-foam, catholyte: 0.1 M divanillin in 1 M sodium hydroxide (first batch of divanillin), anolyte: 1 M sodium hydroxide, room temperature, catholyte stirred at 250 rpm.

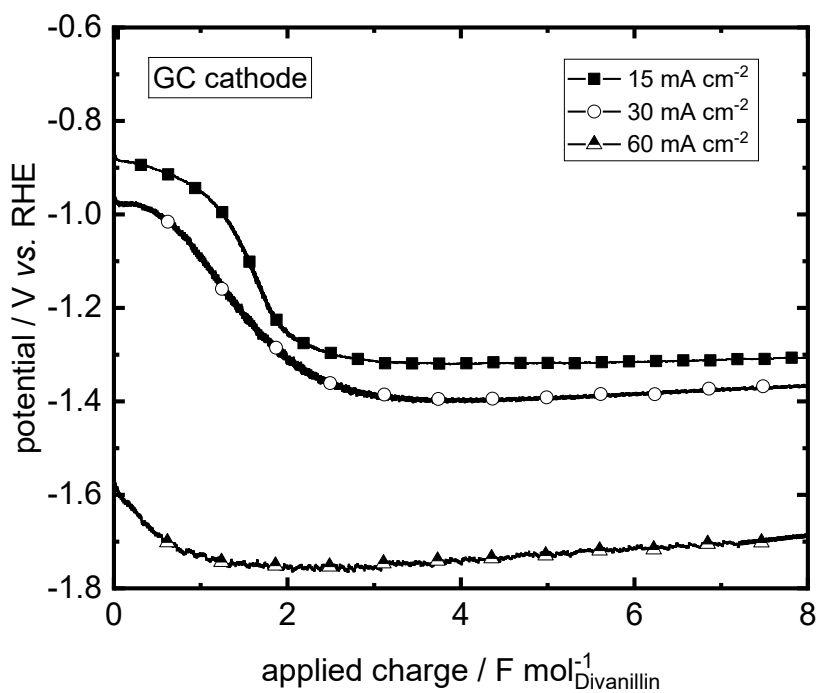

**Fig S10** Potential-charge plots of the electrochemical divanillin reduction at a GC cathode (5 cm<sup>2</sup>). Electrolysis was performed under following conditions – anode: Ni-foam, catholyte: 0.1 M divanillin in 1 M sodium hydroxide (first batch of divanillin), anolyte: 1 M sodium hydroxide, room temperature, catholyte stirred at 250 rpm.

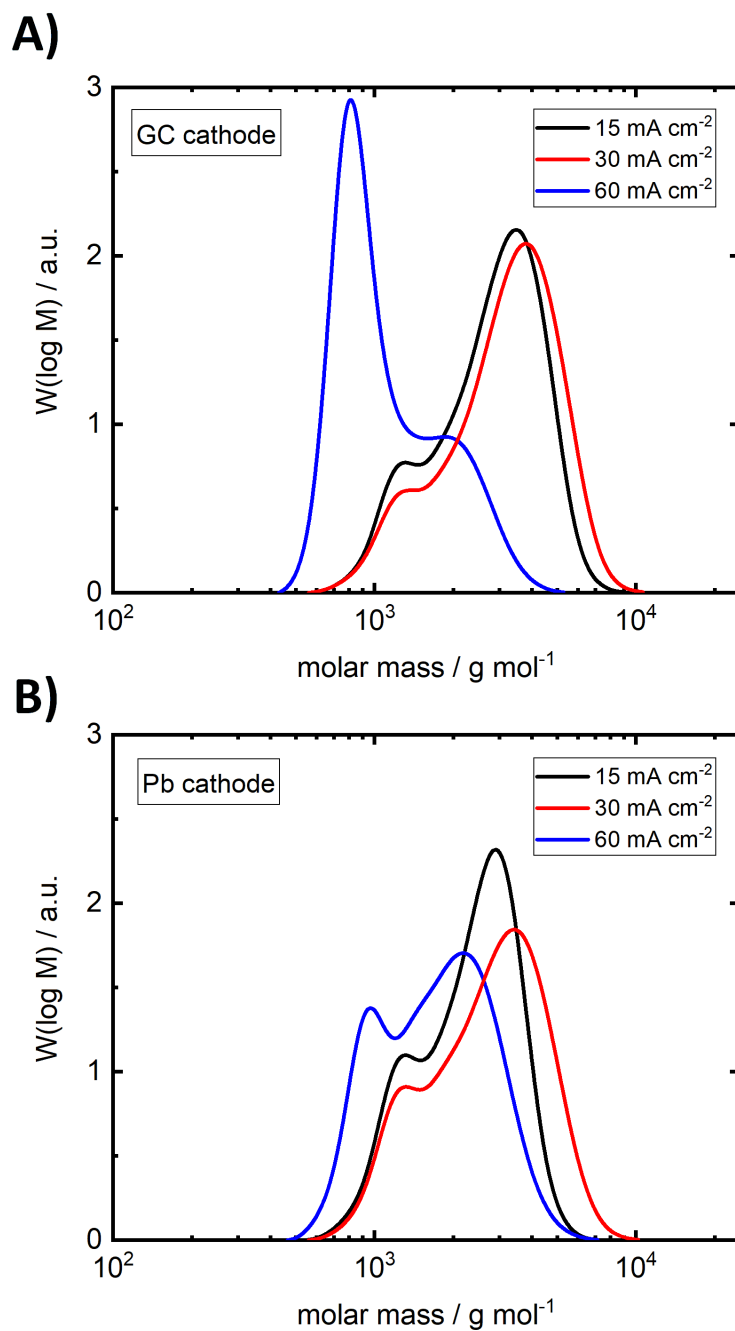

**Fig S11** MWDs of isolated polyvanillin synthesized at a glassy carbon cathode (A) and a Pb cathode (B). Electrolysis was performed under following conditions – applied charge:  $8 \text{ F mol}^{-1}$ , catholyte: 0.1 M divanillin in 1 M sodium hydroxide (first batch of divanillin), anolyte: 1 M sodium hydroxide, room temperature, catholyte stirred at 250 rpm, isolated products were analyzed by SEC. SEC was calibrated versus pullulan standard.

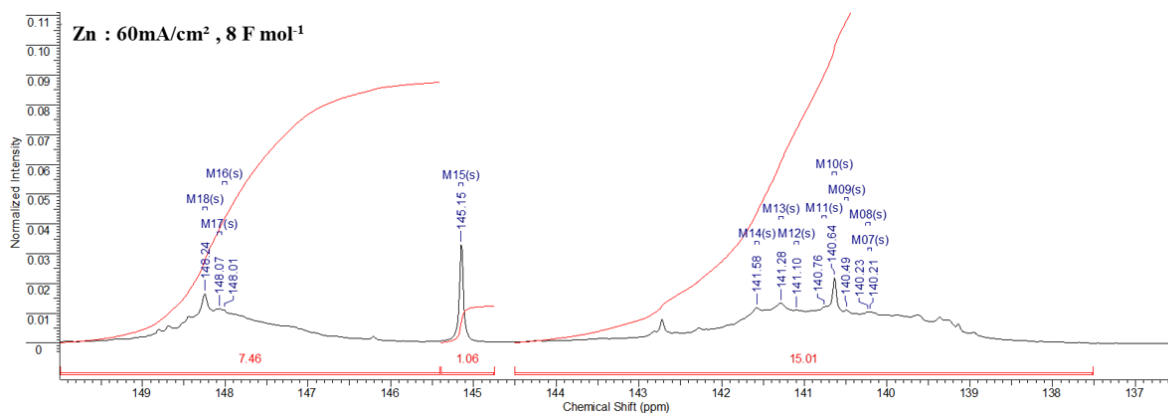

**Fig. S12** <sup>31</sup>P-NMR analysis of the polyvanillin sample generated by electrochemical pinacolization of 5,5'-bis-vanillin at a Zn-cathode at a current density of 60 mA cm<sup>-2</sup> and an applied charge of 8 F mol<sup>-1</sup>, after in-situ labelling with 2-Chloro-4,4,5,5-tetramethyl-1,3,2-dioxaphospholane (Cl-TMDP) in pyridine / CDCl<sub>3</sub> = 1.6 / 1 (v / v). Chemical shifts are reported relative to the sharp signal (132.2 ppm) originating from the reaction between traces of H<sub>2</sub>O and Cl-TMDP. Internal standard: Cyclohexanol (peak: 145.15 ppm); integration region for aliphatic hydroxy groups: 150.0-145.4 ppm and for total phenolic hydroxy groups: 144.5 – 137.5 ppm.
